# Supplementary material for: Machine Learning to Predict Faricimab Treatment Outcome in Neovascular Age-Related Macular Degeneration
Source: PubMed Central journal article supplement (PMC10585644; doi:10.1016/j.xops.2023.100385), 2023-08-18

**A**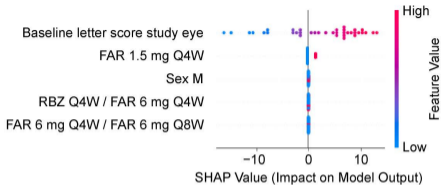**B**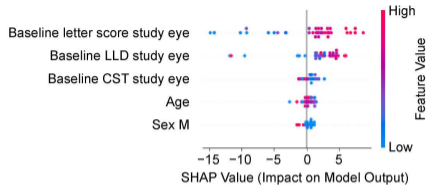**C**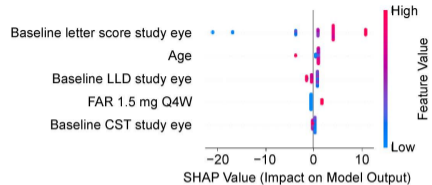**D**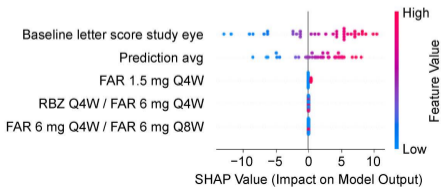**E**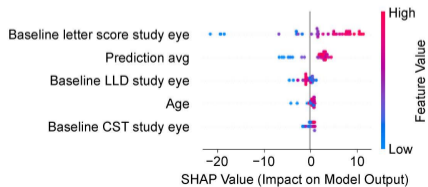**F**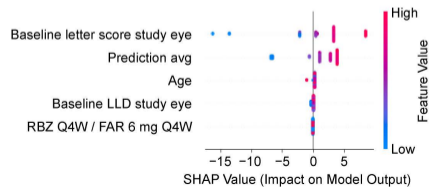

Supplement: mmc2.pdf [file mmc2.pdf]
