# Supplementary material for: Machine Learning to Predict Faricimab Treatment Outcome in Neovascular Age-Related Macular Degeneration
Source: PubMed Central journal article supplement (PMC10585644; doi:10.1016/j.xops.2023.100385), 2023-08-18

A

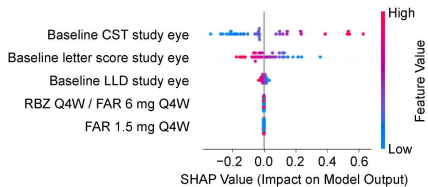

B

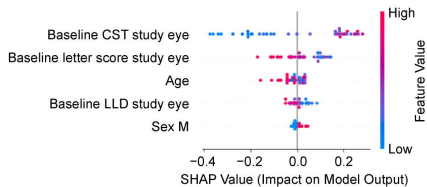

C

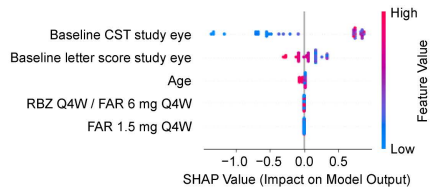

D

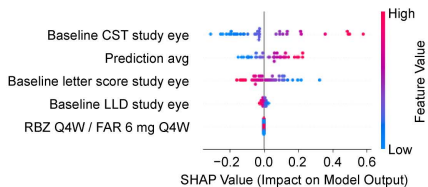

E

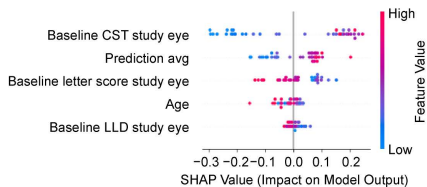

F

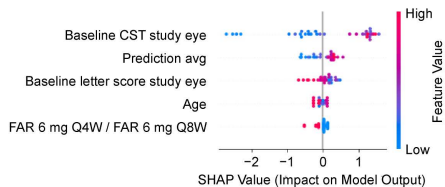

Supplement: mmc3.pdf [file mmc3.pdf]
