# Supplementary material for: Machine Learning to Predict Faricimab Treatment Outcome in Neovascular Age-Related Macular Degeneration
Source: PubMed Central journal article supplement (PMC10585644; doi:10.1016/j.xops.2023.100385), 2023-08-18

Linear BM

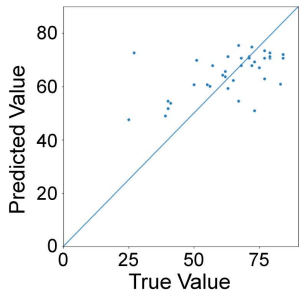

RF BM

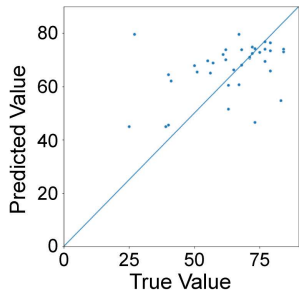

XGB BM

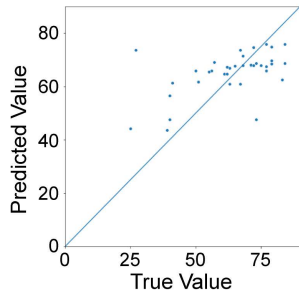

DNN BM

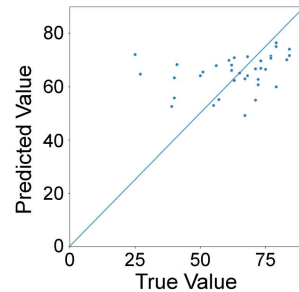

Linear MS

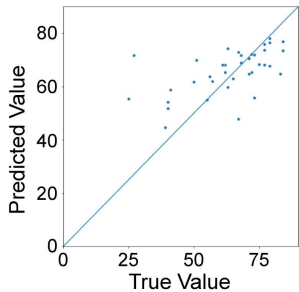

RF MS

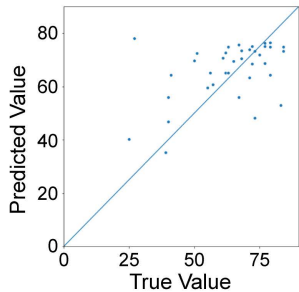

XGB MS

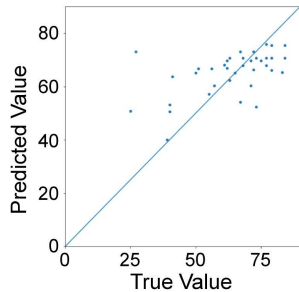

Linear MA

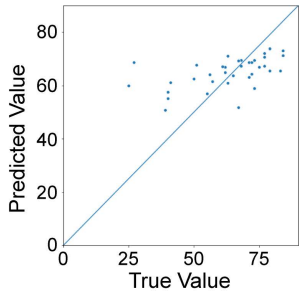

RF MA

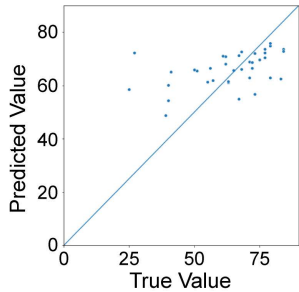

XGB MA

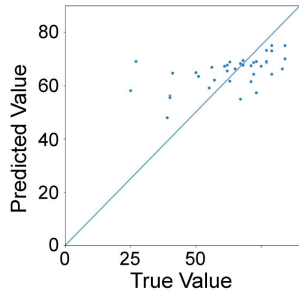

Supplement: mmc4.pdf [file mmc4.pdf]
