# Supplementary material for: Machine Learning to Predict Faricimab Treatment Outcome in Neovascular Age-Related Macular Degeneration
Source: PubMed Central journal article supplement (PMC10585644; doi:10.1016/j.xops.2023.100385), 2023-08-18
Supplement: mmc6.pdf [file mmc6.pdf]

Linear BM

|             | Pred.<br>Yes | Pred.<br>No |
|-------------|--------------|-------------|
| Act.<br>Yes | 17           | 4           |
| Act.<br>No  | 2            | 14          |

RF BM

|             | Pred.<br>Yes | Pred.<br>No |
|-------------|--------------|-------------|
| Act.<br>Yes | 19           | 2           |
| Act.<br>No  | 5            | 11          |

XGB BM

|             | Pred.<br>Yes | Pred.<br>No |
|-------------|--------------|-------------|
| Act.<br>Yes | 19           | 2           |
| Act.<br>No  | 6            | 10          |

DNN BM

|             | Pred.<br>Yes | Pred.<br>No |
|-------------|--------------|-------------|
| Act.<br>Yes | 15           | 6           |
| Act.<br>No  | 3            | 13          |

Linear MS

|             | Pred.<br>Yes | Pred.<br>No |
|-------------|--------------|-------------|
| Act.<br>Yes | 20           | 1           |
| Act.<br>No  | 5            | 11          |

RF MS

|             | Pred.<br>Yes | Pred.<br>No |
|-------------|--------------|-------------|
| Act.<br>Yes | 19           | 2           |
| Act.<br>No  | 5            | 11          |

XGB MS

|             | Pred.<br>Yes | Pred.<br>No |
|-------------|--------------|-------------|
| Act.<br>Yes | 19           | 2           |
| Act.<br>No  | 4            | 12          |

Linear MA

|             | Pred.<br>Yes | Pred.<br>No |
|-------------|--------------|-------------|
| Act.<br>Yes | 16           | 5           |
| Act.<br>No  | 3            | 13          |

RF MA

|             | Pred.<br>Yes | Pred.<br>No |
|-------------|--------------|-------------|
| Act.<br>Yes | 16           | 5           |
| Act.<br>No  | 3            | 13          |

XGB MA

|             | Pred.<br>Yes | Pred.<br>No |
|-------------|--------------|-------------|
| Act.<br>Yes | 19           | 2           |
| Act.<br>No  | 6            | 10          |
